# Supplementary material for: Retinal Vascular Fractal Dimension, Childhood IQ, and Cognitive Ability in Old Age: The Lothian Birth Cohort Study 1936
Source: PubMed Central journal article supplement (PMC4376388; doi:10.1371/journal.pone.0121119), 2015-03-27
Supplement: pone.0121119.s001.pdf [file pone.0121119.s001.pdf]

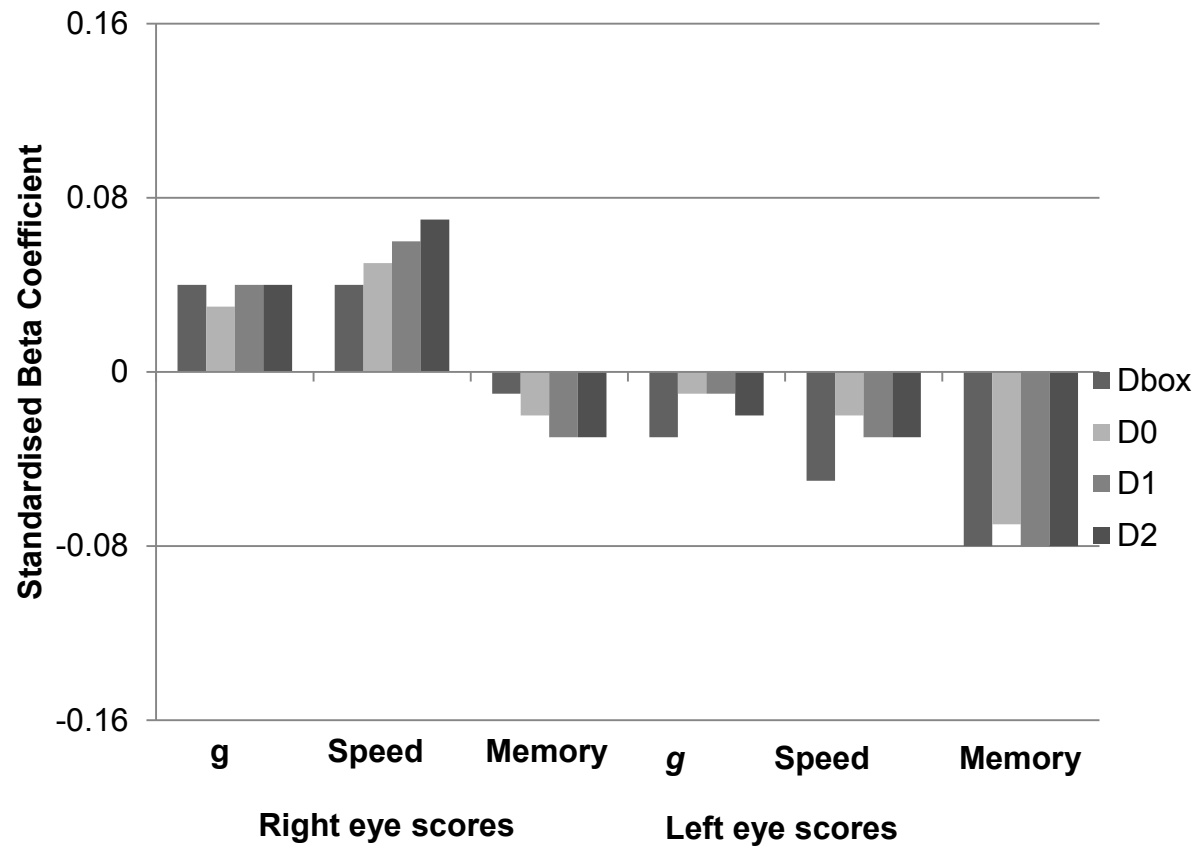

**Supporting Information Figure S1. Change in cognitive domain score associated with an increase of 1 SD unit in right or left eye fractal dimension. Dbox = monofractal dimension. D0, D1, D2 = multifractal dimension.  $\beta$  significant at  $\pm 0.08$  ( $p < 0.05$ ).**
