# Supplementary material for: Retinal Vascular Fractal Dimension, Childhood IQ, and Cognitive Ability in Old Age: The Lothian Birth Cohort Study 1936
Source: PubMed Central journal article supplement (PMC4376388; doi:10.1371/journal.pone.0121119), 2015-03-27
Supplement: pone.0121119.s003.pdf [file pone.0121119.s003.pdf]

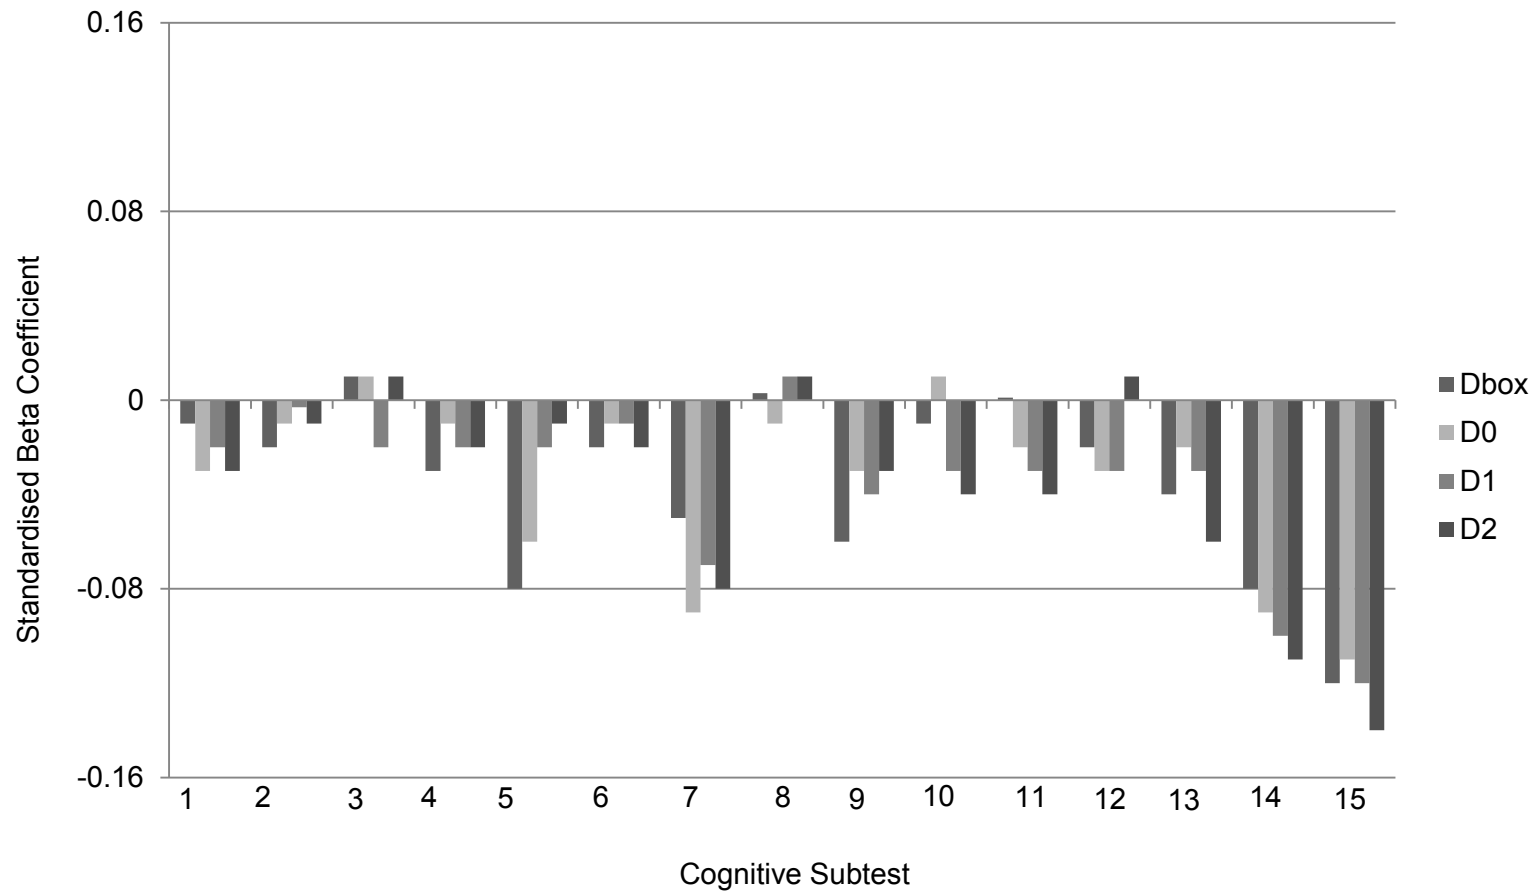

**Supporting Information Figure S3. Change in cognitive subtest score associated with an increase of 1 SD unit in left eye fractal dimension.** Dbox = monofractal dimension. D0, D1, D2 = multifractal dimension.  $\beta$  significant at  $\pm 0.08$  ( $p < 0.05$ ). 1: Symbol search, 2: digit symbol coding, 3: matrix reasoning,

4: letter-number sequencing, 5: digit span backwards, 6: block design, 7: simple reaction time, 8: 4-choice reaction time, 9: inspection time, 10: spatial span forwards, 11: spatial span backwards, 12: verbal paired associates immediate recall, 13: verbal paired associates delayed recall, 14: logical memory immediate recall, 15: logical memory delayed recall.
