# Supplementary material for: Retinal Vascular Fractal Dimension, Childhood IQ, and Cognitive Ability in Old Age: The Lothian Birth Cohort Study 1936
Source: PubMed Central journal article supplement (PMC4376388; doi:10.1371/journal.pone.0121119), 2015-03-27
Supplement: pone.0121119.s004.pdf [file pone.0121119.s004.pdf]

Supporting Information Table S1. Multiple Regression Models Using Retinal Vascular Fractal Dimension to predict Ability in Cognitive Subtests.

| Cognitive Subtest                | Fractal Dimension | Laterality of Eye | Model 1  |         |              | Model 2  |         |               | Model 3  |         |               |
|----------------------------------|-------------------|-------------------|----------|---------|--------------|----------|---------|---------------|----------|---------|---------------|
|                                  |                   |                   | <i>N</i> | $\beta$ | <i>P</i>     | <i>N</i> | $\beta$ | <i>P</i>      | <i>N</i> | $\beta$ | <i>P</i>      |
| <u>Symbol Search</u>             | $D_{\text{box}}$  | R                 | 537      | 0.06    | .174         | 506      | 0.07    | <b>.096 †</b> | 506      | 0.08    | <b>.051 †</b> |
|                                  |                   | L                 | 530      | -0.02   | .689         | 491      | -0.01   | .799          | 491      | -0.01   | .741          |
|                                  | $D_0$             | R                 | 538      | 0.10    | <b>.016*</b> | 507      | 0.08    | <b>.058 †</b> | 507      | 0.09    | <b>.032*</b>  |
|                                  |                   | L                 | 531      | -0.03   | .439         | 492      | -0.03   | .443          | 492      | -0.03   | .428          |
|                                  | $D_1$             | R                 | 539      | 0.13    | <b>.003*</b> | 507      | 0.10    | <b>.014*</b>  | 507      | 0.11    | <b>.009*</b>  |
|                                  |                   | L                 | 529      | -0.02   | .691         | 490      | -0.01   | .765          | 490      | -0.02   | .571          |
|                                  | $D_2$             | R                 | 538      | 0.13    | <b>.003*</b> | 506      | 0.11    | <b>.006*</b>  | 506      | 0.12    | <b>.004*</b>  |
|                                  |                   | L                 | 528      | -0.02   | .636         | 489      | -0.02   | .642          | 489      | -0.03   | .486          |
| <u>Digit Symbol Substitution</u> | $D_{\text{box}}$  | R                 | 537      | 0.04    | .424         | 506      | 0.04    | .387          | 506      | 0.05    | .267          |
|                                  |                   | L                 | 530      | -0.02   | .648         | 491      | -0.03   | .482          | 491      | -0.02   | .551          |
|                                  | $D_0$             | R                 | 538      | 0.05    | .198         | 507      | 0.02    | .565          | 507      | 0.03    | .448          |
|                                  |                   | L                 | 531      | -0.002  | .957         | 492      | -0.01   | .737          | 492      | -0.01   | .763          |
|                                  | $D_1$             | R                 | 539      | 0.09    | <b>.043*</b> | 507      | 0.04    | .277          | 507      | 0.05    | .222          |
|                                  |                   | L                 | 529      | 0.01    | .749         | 490      | 0.003   | .949          | 490      | -0.003  | .944          |
|                                  | $D_2$             | R                 | 538      | 0.09    | <b>.037*</b> | 506      | 0.06    | .130          | 506      | 0.06    | .110          |
|                                  |                   | L                 | 528      | 0.01    | .812         | 489      | -0.004  | .920          | 489      | -0.01   | .851          |
| <u>Matrix Reasoning</u>          | $D_{\text{box}}$  | R                 | 537      | 0.02    | .622         | 506      | 0.02    | .649          | 506      | 0.02    | .582          |
|                                  |                   | L                 | 529      | 0.01    | .848         | 490      | 0.01    | .754          | 490      | 0.01    | .804          |
|                                  | $D_0$             | R                 | 538      | 0.03    | .487         | 507      | -0.01   | .787          | 507      | -0.01   | .866          |
|                                  |                   | L                 | 530      | 0.02    | .670         | 491      | 0.01    | .800          | 491      | 0.01    | .832          |
|                                  | $D_1$             | R                 | 539      | 0.04    | .321         | 507      | -0.01   | .852          | 507      | -0.01   | .889          |
|                                  |                   | L                 | 528      | 0.003   | .946         | 489      | -0.01   | .857          | 489      | -0.02   | .705          |

|                                 |                  |   |     |        |               |     |        |      |     |        |               |
|---------------------------------|------------------|---|-----|--------|---------------|-----|--------|------|-----|--------|---------------|
|                                 | D <sub>2</sub>   | R | 538 | 0.03   | .436          | 506 | -0.01  | .900 | 506 | -0.01  | .892          |
|                                 |                  | L | 527 | -0.002 | .968          | 488 | -0.01  | .735 | 491 | 0.01   | .832          |
| <u>Letter-Number Sequencing</u> | D <sub>box</sub> | R | 536 | -0.01  | .831          | 505 | -0.01  | .872 | 505 | -0.003 | .934          |
|                                 |                  | L | 529 | -0.02  | .637          | 490 | -0.03  | .459 | 490 | -0.03  | .447          |
|                                 | D <sub>0</sub>   | R | 537 | 0.05   | .295          | 506 | 0.004  | .912 | 506 | 0.01   | .774          |
|                                 |                  | L | 530 | 0.01   | .803          | 491 | -0.01  | .905 | 491 | -0.01  | .906          |
|                                 | D <sub>1</sub>   | R | 538 | 0.06   | .199          | 506 | 0.01   | .750 | 506 | 0.02   | .676          |
|                                 |                  | L | 528 | -0.001 | .988          | 489 | -0.02  | .669 | 489 | -0.02  | .617          |
|                                 | D <sub>2</sub>   | R | 537 | 0.05   | .250          | 505 | 0.02   | .640 | 505 | 0.02   | .627          |
|                                 |                  | L | 527 | 0.01   | .893          | 488 | -0.02  | .718 | 488 | -0.02  | .691          |
| <u>Digit Span Backwards</u>     | D <sub>box</sub> | R | 537 | -0.03  | .551          | 506 | -0.03  | .416 | 506 | -0.03  | .419          |
|                                 |                  | L | 530 | -0.06  | .150          | 491 | -0.08  | .059 | 491 | -0.08  | <b>.052 †</b> |
|                                 | D <sub>0</sub>   | R | 538 | 0.01   | .809          | 507 | -0.03  | .420 | 507 | -0.04  | .400          |
|                                 |                  | L | 531 | -0.03  | .437          | 492 | -0.05  | .255 | 492 | -0.06  | .192          |
|                                 | D <sub>1</sub>   | R | 539 | 0.02   | .629          | 507 | -0.03  | .430 | 507 | -0.03  | .403          |
|                                 |                  | L | 529 | 0.001  | .988          | 490 | -0.01  | .777 | 490 | -0.02  | .670          |
|                                 | D <sub>2</sub>   | R | 538 | 0.01   | .741          | 506 | -0.03  | .542 | 506 | -0.03  | .508          |
|                                 |                  | L | 528 | 0.01   | .834          | 489 | -0.01  | .868 | 489 | -0.01  | .754          |
| <u>Block Design</u>             | D <sub>box</sub> | R | 536 | 0.06   | .181          | 505 | 0.04   | .278 | 505 | 0.05   | .202          |
|                                 |                  | L | 529 | -0.01  | .842          | 490 | -0.02  | .642 | 490 | -0.02  | .567          |
|                                 | D <sub>0</sub>   | R | 537 | 0.06   | .153          | 506 | 0.01   | .818 | 506 | 0.02   | .599          |
|                                 |                  | L | 530 | 0.02   | .735          | 491 | -0.002 | .962 | 491 | -0.01  | .821          |
|                                 | D <sub>1</sub>   | R | 538 | 0.08   | <b>.079 †</b> | 506 | 0.02   | .656 | 506 | 0.02   | .546          |
|                                 |                  | L | 528 | 0.01   | .741          | 489 | 0.01   | .830 | 489 | -0.01  | .857          |

|                               |                  |   |     |       |               |     |        |               |     |       |               |
|-------------------------------|------------------|---|-----|-------|---------------|-----|--------|---------------|-----|-------|---------------|
|                               | D <sub>2</sub>   | R | 537 | 0.06  | .157          | 505 | 0.02   | .603          | 505 | 0.02  | .593          |
|                               |                  | L | 527 | 0.002 | .972          | 488 | -0.004 | .922          | 488 | -0.02 | .663          |
| <u>4-Choice Reaction Time</u> | D <sub>box</sub> | R | 537 | -0.03 | .576          | 506 | -0.04  | .379          | 506 | -0.05 | .308          |
|                               |                  | L | 530 | -0.01 | .754          | 491 | 0.01   | .785          | 491 | 0.003 | .953          |
|                               | D <sub>0</sub>   | R | 538 | -0.06 | .158          | 507 | -0.05  | .302          | 507 | -0.05 | .278          |
|                               |                  | L | 531 | -0.03 | .540          | 492 | -0.01  | .874          | 492 | -0.01 | .805          |
|                               | D <sub>1</sub>   | R | 539 | -0.07 | .134          | 507 | -0.05  | .295          | 507 | -0.05 | .278          |
|                               |                  | L | 529 | -0.01 | .778          | 490 | 0.01   | .769          | 490 | 0.01  | .809          |
|                               | D <sub>2</sub>   | R | 538 | -0.05 | .255          | 506 | -0.04  | .360          | 506 | -0.04 | .343          |
|                               |                  | L | 528 | -0.01 | .786          | 489 | 0.02   | .733          | 489 | 0.01  | .789          |
| <u>Simple Reaction Time</u>   | D <sub>box</sub> | R | 537 | -0.02 | .587          | 506 | -0.02  | .701          | 506 | -0.02 | .719          |
|                               |                  | L | 530 | -0.05 | .282          | 491 | -0.05  | .306          | 491 | -0.05 | .274          |
|                               | D <sub>0</sub>   | R | 538 | -0.02 | .680          | 507 | 0.01   | .884          | 507 | 0.01  | .828          |
|                               |                  | L | 531 | -0.08 | <b>.073 †</b> | 492 | -0.09  | <b>.052 †</b> | 492 | -0.09 | <b>.048*</b>  |
|                               | D <sub>1</sub>   | R | 539 | -0.01 | .841          | 507 | 0.01   | .782          | 507 | 0.02  | .732          |
|                               |                  | L | 529 | -0.06 | .203          | 490 | -0.07  | .127          | 490 | -0.07 | .106          |
|                               | D <sub>2</sub>   | R | 538 | 0.01  | .837          | 506 | 0.02   | .611          | 506 | 0.02  | .587          |
|                               |                  | L | 528 | -0.06 | .175          | 489 | -0.07  | .100          | 489 | -0.08 | <b>.087 †</b> |
| <u>Inspection Time</u>        | D <sub>box</sub> | R | 525 | -0.02 | .655          | 495 | -0.04  | .390          | 495 | -0.03 | .481          |
|                               |                  | L | 517 | -0.05 | .281          | 479 | -0.06  | .186          | 479 | -0.06 | .223          |
|                               | D <sub>0</sub>   | R | 526 | 0.02  | .592          | 496 | -0.02  | .600          | 496 | -0.02 | .686          |
|                               |                  | L | 518 | -0.02 | .610          | 480 | -0.03  | .459          | 480 | -0.03 | .523          |
|                               | D <sub>1</sub>   | R | 527 | 0.01  | .756          | 496 | -0.03  | .577          | 496 | -0.02 | .640          |
|                               |                  | L | 516 | -0.02 | .650          | 478 | -0.03  | .448          | 478 | -0.04 | .443          |
|                               | D <sub>2</sub>   | R | 526 | 0.01  | .742          | 495 | -0.01  | .799          | 495 | -0.01 | .847          |
|                               |                  | L | 516 | -0.01 | .844          | 478 | -0.03  | .548          | 478 | -0.03 | .525          |

|                                 |                  |   |     |       |               |     |        |      |     |        |      |
|---------------------------------|------------------|---|-----|-------|---------------|-----|--------|------|-----|--------|------|
| <u>Spatial Span Forwards</u>    | D <sub>box</sub> | R | 536 | 0.01  | .858          | 505 | 0.004  | .922 | 505 | 0.01   | .836 |
|                                 |                  | L | 529 | 0.004 | .922          | 490 | -0.01  | .890 | 490 | -0.01  | .852 |
|                                 | D <sub>0</sub>   | R | 537 | 0.01  | .838          | 506 | -0.02  | .639 | 506 | -0.01  | .759 |
|                                 |                  | L | 530 | 0.004 | .918          | 491 | 0.01   | .913 | 491 | 0.01   | .904 |
|                                 | D <sub>1</sub>   | R | 538 | 0.02  | .603          | 506 | -0.01  | .765 | 506 | -0.01  | .852 |
|                                 |                  | L | 528 | -0.01 | .900          | 489 | -0.02  | .687 | 489 | -0.03  | .506 |
|                                 | D <sub>2</sub>   | R | 537 | 0.02  | .647          | 505 | -0.004 | .934 | 505 | -0.001 | .975 |
|                                 |                  | L | 527 | -0.01 | .744          | 488 | -0.03  | .464 | 488 | -0.04  | .357 |
| <u>Spatial Span Backwards</u>   | D <sub>box</sub> | R | 534 | 0.05  | .266          | 504 | 0.05   | .254 | 504 | 0.05   | .224 |
|                                 |                  | L | 527 | 0.000 | .995          | 489 | 0.01   | .868 | 489 | 0.001  | .984 |
|                                 | D <sub>0</sub>   | R | 535 | 0.04  | .333          | 505 | 0.01   | .761 | 505 | 0.02   | .608 |
|                                 |                  | L | 528 | -0.02 | .658          | 490 | -0.02  | .699 | 490 | -0.02  | .701 |
|                                 | D <sub>1</sub>   | R | 536 | 0.07  | <b>.090 †</b> | 505 | 0.03   | .439 | 505 | 0.04   | .357 |
|                                 |                  | L | 526 | -0.02 | .599          | 488 | -0.03  | .575 | 488 | -0.03  | .451 |
|                                 | D <sub>2</sub>   | R | 535 | 0.06  | .140          | 504 | 0.04   | .401 | 504 | 0.04   | .365 |
|                                 |                  | L | 525 | -0.03 | .567          | 487 | -0.03  | .498 | 487 | -0.04  | .415 |
| <u>Verbal Paired Associates</u> | D <sub>box</sub> | R | 526 | 0.03  | .533          | 497 | 0.03   | .457 | 497 | 0.04   | .350 |
|                                 |                  | L | 516 | -0.02 | .675          | 479 | -0.02  | .716 | 479 | -0.02  | .683 |
|                                 | D <sub>0</sub>   | R | 527 | 0.04  | .362          | 498 | 0.01   | .743 | 498 | 0.02   | .681 |
|                                 |                  | L | 517 | -0.03 | .533          | 480 | -0.03  | .503 | 480 | -0.03  | .530 |
|                                 | D <sub>1</sub>   | R | 528 | 0.01  | .914          | 498 | -0.02  | .657 | 498 | -0.02  | .713 |
|                                 |                  | L | 515 | -0.02 | .610          | 478 | -0.03  | .513 | 478 | -0.03  | .498 |
|                                 | D <sub>2</sub>   | R | 527 | -0.02 | .706          | 497 | -0.03  | .459 | 497 | -0.03  | .487 |
|                                 |                  | L | 514 | -0.02 | .595          | 477 | -0.03  | .481 | 477 | -0.03  | .457 |
| <u>VPA Delayed Recall</u>       | D <sub>box</sub> | R | 525 | 0.03  | .575          | 496 | 0.03   | .489 | 496 | 0.04   | .353 |

|                          |                  |   |     |        |               |     |       |              |     |       |              |
|--------------------------|------------------|---|-----|--------|---------------|-----|-------|--------------|-----|-------|--------------|
|                          |                  | L | 516 | -0.05  | .261          | 479 | -0.04 | .348         | 479 | -0.04 | .309         |
|                          | D <sub>0</sub>   | R | 526 | 0.07   | .101          | 497 | 0.05  | .277         | 497 | 0.05  | .220         |
|                          |                  | L | 517 | -0.02  | .612          | 480 | -0.02 | .662         | 480 | -0.02 | .726         |
|                          | D <sub>1</sub>   | R | 527 | 0.02   | .590          | 497 | 0.000 | 1.000        | 497 | 0.01  | .897         |
|                          |                  | L | 515 | -0.04  | .380          | 478 | -0.03 | .493         | 478 | -0.03 | .455         |
|                          | D <sub>2</sub>   | R | 526 | 0.002  | .966          | 496 | -0.01 | .736         | 496 | -0.01 | .802         |
|                          |                  | L | 514 | -0.07  | .136          | 477 | -0.06 | .170         | 477 | -0.06 | .149         |
| <u>Logical Memory</u>    | D <sub>box</sub> | R | 535 | -0.05  | .281          | 504 | -0.05 | .244         | 504 | -0.05 | .249         |
|                          |                  | L | 528 | -0.08  | <b>.062 †</b> | 489 | -0.08 | <b>.048*</b> | 489 | -0.08 | <b>.045*</b> |
|                          | D <sub>0</sub>   | R | 536 | -0.01  | .775          | 505 | -0.05 | .206         | 505 | -0.05 | .183         |
|                          |                  | L | 529 | -0.07  | .101          | 490 | -0.08 | <b>.043*</b> | 490 | -0.09 | <b>.034*</b> |
|                          | D <sub>1</sub>   | R | 537 | -0.001 | .986          | 505 | -0.04 | .276         | 505 | -0.05 | .254         |
|                          |                  | L | 527 | -0.10  | <b>.028*</b>  | 488 | -0.09 | <b>.020*</b> | 488 | -0.10 | <b>.018*</b> |
|                          | D <sub>2</sub>   | R | 536 | -0.02  | .705          | 504 | -0.05 | .229         | 504 | -0.05 | .218         |
|                          |                  | L | 526 | -0.10  | <b>.022*</b>  | 487 | -0.10 | <b>.013*</b> | 487 | -0.11 | <b>.011*</b> |
| <u>LM Delayed Recall</u> | D <sub>box</sub> | R | 535 | -0.04  | .428          | 504 | -0.03 | .448         | 504 | -0.03 | .492         |
|                          |                  | L | 528 | -0.11  | <b>.015*</b>  | 489 | -0.12 | <b>.005*</b> | 489 | -0.12 | <b>.003*</b> |
|                          | D <sub>0</sub>   | R | 536 | -0.004 | .935          | 505 | -0.03 | .426         | 505 | -0.03 | .417         |
|                          |                  | L | 529 | -0.08  | <b>.059 †</b> | 490 | -0.10 | <b>.016*</b> | 490 | -0.11 | .010         |
|                          | D <sub>1</sub>   | R | 537 | 0.01   | .865          | 505 | -0.02 | .572         | 505 | -0.03 | .547         |
|                          |                  | L | 527 | -0.10  | <b>.021*</b>  | 488 | -0.11 | <b>.009*</b> | 488 | -0.12 | <b>.004*</b> |
|                          | D <sub>2</sub>   | R | 536 | -0.003 | .950          | 504 | -0.03 | .546         | 504 | -0.03 | .509         |
|                          |                  | L | 526 | -0.11  | <b>.009*</b>  | 487 | -0.13 | <b>.002*</b> | 487 | -0.14 | <b>.001*</b> |

Note. \*  $p < 0.05$ ; † trend  $p < 0.10$ . D<sub>box</sub> = monofractal dimension; D<sub>0</sub>, D<sub>1</sub>, D<sub>2</sub> = multifractal dimension; VPA = verbal paired associates; LM = logical memory.

Standardised beta coefficients reflect change in cognitive subtest score associated with an increase of 1 SD unit in fractal dimension. Model 1 adjusted for

age and sex; Model 2 adjusted for age, sex, and age 11 IQ; Model 3 adjusted for age, sex, age 11 IQ, hypertension, diabetes, cardiovascular history, stroke, current smoking status. *N* varies due to incomplete range of fractal dimension measurements and/or missing subtest data.
